# Supplementary material for: Nuclear and Mitochondrial Data on Trichuris from Macaca fuscata Support Evidence of Host Specificity
Source: PubMed Central journal article supplement (PMC7823418; doi:10.3390/life11010018), 2020-12-31
Supplement: life-11-00018-s001.pdf [file life-11-00018-s001.pdf]

# Supplementary Materials of Nuclear and Mitochondrial Data on *Trichuris* from *Macaca fuscata* Support Evidence of Host Specificity

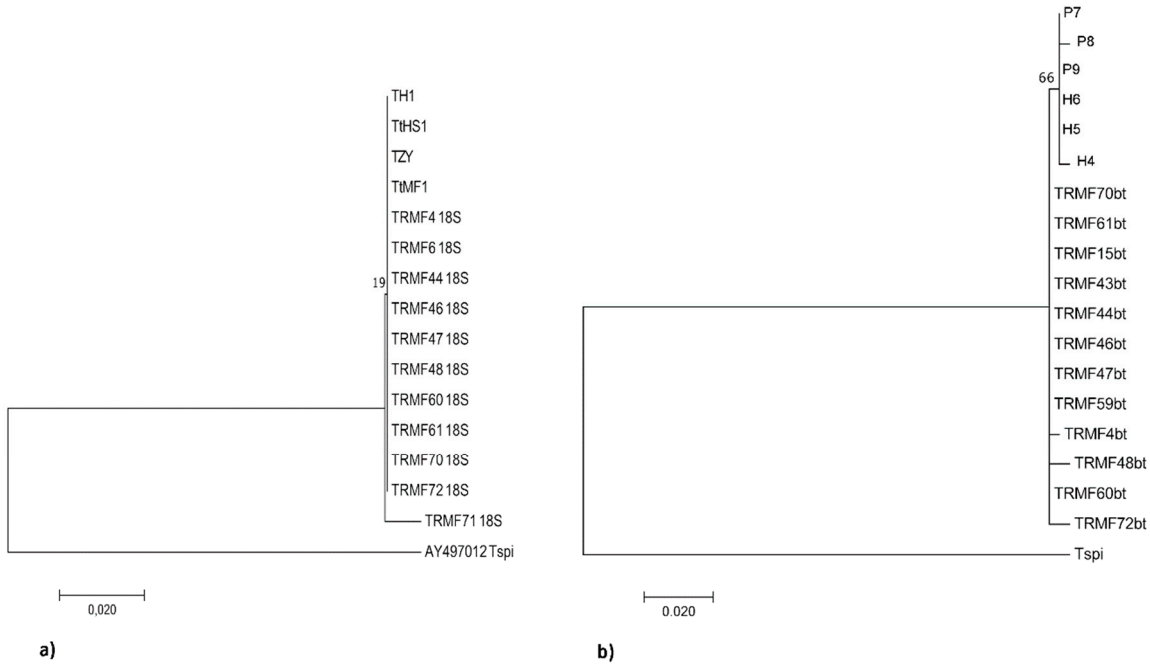

**Figure S1.** ML trees elaborated from the Dataset\_18S (**a**) and the Dataset\_btub (**b**) showing the evolutionary relationships of *Trichuris* spp. included (see Table 2). Bootstrap values are reported at nodes.
